# Supplementary material
Source: publisher site journal article supplement (https://www.spandidos-publications.com/7485/downloadSupplementary)
Supplement: Supplementary file 1 [file downloadSupplementary]

**Table SI.** Details of pathological section (diagnosis: liver cancer).

| Pathological number | Hospitalization number | Age | HIS ID   |
|---------------------|------------------------|-----|----------|
| P2200594            | 10868677               | 39  | 10868677 |
| P2206641            | P2206641               | 48  | 11875129 |
| P2208206            | 11844123               | 33  | 11844123 |
| P2214213            | 24847031               | 37  | 24847031 |
| P2214520            | 10763139               | 46  | 10763139 |
| P2216292            | 21471790               | 34  | 21471790 |
| P2302207            | 12134542               | 41  | 12134542 |
| P2306700            | 10925573               | 36  | 10925573 |
| P2308809            | 10109645               | 36  | 10109645 |
| P2309234            | 10763139               | 47  | 10763139 |
| P2309745            | 34862887               | 35  | 34862887 |
| P2313522            | 35603757               | 58  | 35603757 |
| P2313935            | 12139423               | 49  | 12139423 |
| P2318187            | 11574845               | 49  | 11574845 |
| P2319685            | 36486266               | 61  | 36486266 |
| P2321212            | 15224020               | 35  | 15224020 |
